# Supplementary material for: A glucagon-like peptide-1 analog, liraglutide, ameliorates endothelial dysfunction through miRNAs to inhibit apoptosis in rats
Source: PeerJ. 2019 Mar 6;7:e6567. doi: 10.7717/peerj.6567 (PMC6408912; doi:10.7717/peerj.6567)
Supplement: Supplemental Information 1 [file peerj-07-6567-s001.xlsx]

## Sheet: Sheet1
	body weight (g)	fasting blood glucose (mmol/L)	fasting serum insulin (ng/mL)	HOMA-IR	blood glucose (30')	blood glucose (60')	blood glucose （120')	AUCg (mmol/L/h)	Ach(-10)	Ach(-9)	Ach(-8)	Ach(-7)	Ach(-6)	Ach(-5)	Ach(-4)	miR-26a-5p	miR-34a-5p	miR-93-5p	miR-181b-5p	Pten-qPCR	Creb-qPCR	Bcl-2-qPCR	Sirt-1-qPCR	Pten-WB	Bcl-2-WB
Con-1	539.3	4.9	0.798	3.68428	10.5	8.3	6.5	15.95	87.5	86.8	68.4	56.3	34.3	20.5	8.8	0.98	0.93	0.98	0.99	0.98	1.08	1.04	0.95	0.87	1.15
Con-2	510.9	5.9	1.18	6.55975	10.2	8.5	6.9	16.4	89.4	84.3	70.3	57.3	26.5	15.4	10.5	0.97	1.04	1.02	1.03	0.97	1.03	1.03	0.96	0.91	0.89
Con-3	511.8	4.9	0.882	4.0721	10.2	8.6	6.9	16.225	88.9	83.7	70.3	54.3	29.4	18.4	9.4	0.99	0.95	0.98	1.02	1.03	0.97	0.94	0.94	1.15	1.05
Con-4	510.2	5.4	0.733	3.7295	10.3	8.4	6	15.8	89.3	78.4	74.3	58.3	24.3	13.8	7.6	1.02	1.03	1.03	1.03	1.02	0.98	0.95	0.89	1.05	1.45
Con-5	508.9	5.3	0.917	4.57929	9.9	7.7	6.3	15.2	92.4	80.3	68.3	49.8	25.4	15.3	6.9	1.04	0.94	1.02	1.02	1.01	0.97	1.03	0.99	1.1	0.87
Con-6	491.1	5.7	0.825	4.4308	9.4	6.6	6	14.075	91.4	86.3	69.3	48.3	28.5	17.4	9.5	0.99	0.98	0.98	0.92	0.97	1.03	1	1.02	0.95	1.04
DM-1	502.9	19.3	0.895	16.2755	30.6	21.4	20.9	46.625	90.4	83.7	63.5	50.8	36.8	29.8	23.2	0.58	3.52	3.72	3.23	4.56	0.43	0.59	0.27	3.87	0.17
DM-2	516.2	18.8	1.948	34.5064	29.3	19.2	18.2	42.85	85.3	82.1	71.5	59.3	42.5	29.6	22.5	0.63	3.62	4.54	2.95	4.23	0.38	0.52	0.32	4.12	0.2
DM-3	492.3	20.1	1.5	28.408	32.3	24.9	19.3	49.5	95.3	84.7	73.5	59.8	42.5	28.4	17.4	0.57	3.81	4.32	3.43	3.94	0.29	0.48	0.38	3.97	0.14
DM-4	490.2	23	1.52	32.9401	32.7	29.7	20.3	54.525	94.2	82.5	63.8	58.4	38.4	26.4	18.5	0.59	4.24	4.26	2.86	3.83	0.43	0.44	0.22	4.11	0.19
DM-5	495.2	18.1	1.54	26.2635	32.3	19.3	18.2	44.25	92.3	84.7	69.3	58.6	42.6	29.5	23.5	0.68	4.16	3.82	3.24	4.76	0.45	0.52	0.38	3.88	0.11
DM-6	500.3	14.4	1.56	21.1661	31.8	19.8	13.3	41	89.2	83.2	73.2	59.4	40.3	28.5	22.4	0.64	4.03	3.93	3.13	4.03	0.38	0.51	0.23	3.94	0.21
LL-1	449.6	14	0.56	7.38702	22.7	19.7	18.9	39.075	92.1	79.4	74.8	47.5	29.5	21.4	13.5	0.88	1.92	1.82	1.84	2.33	0.83	0.53	0.44	1.84	0.54
LL-2	476.1	15.8	0.78	11.6119	26.6	19.9	15.4	39.875	90.2	82.5	73.5	43.5	37.4	23.4	15.3	0.87	1.74	1.72	1.96	2.15	0.72	0.63	0.53	1.97	0.46
LL-3	471.8	12.9	0.84	10.2099	26.1	16.6	14.2	35.825	91.4	80.6	69.3	46.3	37.4	20.4	13.5	0.83	1.62	1.65	2.02	2.04	0.84	0.64	0.65	2.3	0.67
LL-4	468.4	16.9	1.09	17.3567	28.8	17.6	16.1	39.875	89.5	81.8	72.4	49.3	34.5	20.4	14.3	0.84	2.22	1.84	1.75	1.83	0.83	0.75	0.74	1.87	0.51
LL-5	481.8	11.3	0.847	9.0181	27.7	17.9	15.4	37.8	93.2	86.4	71.4	56.3	34.2	20.4	13.5	0.94	2.11	1.45	2.16	1.96	0.96	0.54	0.53	1.94	0.42
LL-6	471.6	17.4	1.11	18.1981	21.8	17.5	15.3	36.025	89.5	88.7	64.2	47.5	29.4	16.4	8.6	0.85	1.73	1.83	1.93	1.85	0.74	0.65	0.64	2.16	0.38
HL-1	473.8	17.4	1.238	20.2966	22.9	18.1	16.1	37.425	91.8	85.3	70.4	48.3	28.4	20.3	14.5	0.94	2.04	1.93	1.94	1.74	0.64	0.74	0.73	1.97	0.51
HL-2	469.4	12.8	0.736	8.87649	17.5	15.8	13.4	30.5	87.3	79.8	68.4	48.5	29.5	20.3	12.8	0.98	1.91	2.04	2.25	1.63	0.73	0.83	0.63	2.12	0.47
HL-3	473.2	11.5	0.809	8.76596	16.3	15.4	13.9	29.525	88.9	81.3	70.4	48.5	29.5	15.6	8.4	0.83	2.46	1.73	2.03	2.13	0.62	0.74	0.63	2.1	0.49
HL-4	456.1	13.9	0.821	10.7525	19.7	17.4	13.7	33.225	86.2	79.4	69.4	48.3	30.5	16.4	9.4	0.88	1.94	1.83	1.94	2.06	0.85	0.84	0.74	1.79	0.51
HL-5	461.6	12.3	1.05	12.1688	16.5	14.3	12.5	28.3	90	80.6	79.4	53.5	32.5	15.9	12.3	0.97	1.83	1.93	2.16	1.85	0.84	0.73	0.84	1.84	0.49
HL-6	472.8	14.8	0.962	13.415	19.4	17.4	13.3	33.1	92.8	79.7	73.4	52.4	34.2	18.5	13.5	0.89	2.03	2.12	1.85	1.94	0.63	0.73	0.73	1.9	0.37
	512.033	5.35	0.889167	4.50929	10.0833	8.01667	6.43333	15.6083	89.8167	83.3917	70.5292	52.5208	33.2708	20.9333	13.7417	0.849167	0.978333	1.00167	1.00167	0.996667	1.01	0.998333	0.958333	1.005	1.075
	15.4673	0.408656	0.15635	1.06727	0.386868	0.762671	0.408248	0.85771	1.77923	2.3643	3.63623	5.03785	5.51523	5.15454	5.14578	0.151512	0.0470815	0.0240139	0.0426224	0.0265832	0.0442719	0.0435507	0.0444597	0.111669	0.211825
	499.517	18.95	1.49383	26.5933	31.5	22.3833	18.3667	46.4583	91.1167	83.4833	69.1333	57.7167	40.5167	28.7	21.25	0.615	3.89667	4.09833	3.14	4.225	0.393333	0.51	0.3	3.98167	0.17
	9.46476	2.80339	0.338261	6.96008	1.30077	4.17489	2.71121	4.94046	3.64495	1.09255	4.50363	3.42836	2.47177	1.27122	2.61285	0.0423084	0.293576	0.322268	0.208231	0.367083	0.0581951	0.0497996	0.0712741	0.109803	0.0384708
	469.883	14.7167	0.871167	12.297	25.6167	18.2	15.8833	38.0792	90.9833	83.2333	70.9333	48.4	33.7333	20.4	13.1167	0.868333	1.89	1.71833	1.94333	2.02667	0.82	0.623333	0.588333	2.01333	0.496667
	10.9626	2.39284	0.205728	4.47453	2.78382	1.31453	1.59927	1.83415	1.50654	3.58143	3.79245	4.3188	3.58869	2.28035	2.32415	0.0397073	0.236305	0.151184	0.142361	0.190648	0.085557	0.0809115	0.107966	0.179741	0.102892
	467.817	13.7833	0.936	12.3792	18.7167	16.4	13.8167	32.0125	89.5	81.0167	71.9	49.9167	30.7667	17.8333	11.8167	0.915	2.035	1.93	2.02833	1.89167	0.718333	0.768333	0.716667	1.95333	0.473333
	7.32186	2.12171	0.186671	4.28422	2.49673	1.46014	1.21724	3.2926	2.55029	2.21035	4.03733	2.3769	2.17593	2.16302	2.39785	0.0582237	0.222419	0.140143	0.150919	0.190096	0.10572	0.0519294	0.0789092	0.135597	0.0527889

## Sheet: miR-26a-5p mimic
	miR-26a-5p	Pten
NC-1	0.97	1.03
NC-2	0.97	0.98
NC-3	0.93	1.03
NC-4	0.99	0.98
NC-5	1.03	1.03
NC-6	0.98	0.96
miR-26a-5p mimic-1	878.1	0.68
miR-26a-5p mimic-2	895	0.54
miR-26a-5p mimic-3	894	0.68
miR-26a-5p mimic-4	905	0.63
miR-26a-5p mimic-5	907	0.59
miR-26a-5p mimic-6	903	0.54
	0.978333	1.00167
	0.0325064	0.0318852
	897.017	0.61
	10.679	0.0638749

## Sheet: miR-181a-5p mimic
	miR-181a-5p	Creb
NC-1	0.97	0.94
NC-2	0.98	0.99
NC-3	1.03	1.03
NC-4	0.97	0.97
NC-5	1.04	1.04
NC-6	0.95	0.97
miR-181a-5p mimic-1	1075	0.5
miR-181a-5p mimic-2	1005	0.49
miR-181a-5p mimic-3	1001	0.51
miR-181a-5p mimic-4	1003	0.49
miR-181a-5p mimic-5	1083	0.49
miR-181a-5p mimic-6	1028	0.52
	0.99	0.99
	0.0363318	0.0384708
	1032.5	0.5
	37.4045	0.0126491

## Sheet: miR-34a-5p mimic
	miR-34a-5p	Bcl-2
NC-1	1.03	0.98
NC-2	0.97	1.03
NC-3	1.05	0.95
NC-4	0.98	1.04
NC-5	1.04	0.95
NC-6	1.03	1.04
miR-34a-5p mimic-1	1403	0.69
miR-34a-5p mimic-2	1303	0.71
miR-34a-5p mimic-3	1483	0.74
miR-34a-5p mimic-4	1363	0.67
miR-34a-5p mimic-5	1478	0.74
miR-34a-5p mimic-6	1338	0.72
	1.01667	0.998333
	0.0332666	0.0435507
	1394.67	0.711667
	74.072	0.0278687

## Sheet: miR-93-5p mimic
	miR-93-5p	Sirt1
NC-1	0.98	0.98
NC-2	0.95	0.94
NC-3	1.04	1.03
NC-4	0.96	1.02
NC-5	1.03	0.95
NC-6	1.06	0.96
miR-93-5p mimic-1	1438	0.38
miR-93-5p mimic-2	1485	0.41
miR-93-5p mimic-3	1534	0.43
miR-93-5p mimic-4	1486	0.43
miR-93-5p mimic-5	1548	0.38
miR-93-5p mimic-6	1485	0.43
	1.00333	0.98
	0.0458984	0.0374166
	1496	0.41
	39.6333	0.0244949
